# Supplementary material for: The activity of the aryl hydrocarbon receptor in T cells tunes the gut microenvironment to sustain autoimmunity and neuroinflammation
Source: PubMed Central journal article supplement (PMC9928083; doi:10.1371/journal.pbio.3002000), 2023-02-14
Supplement: pbio.3002000.s001.pdf [file pbio.3002000.s001.pdf]

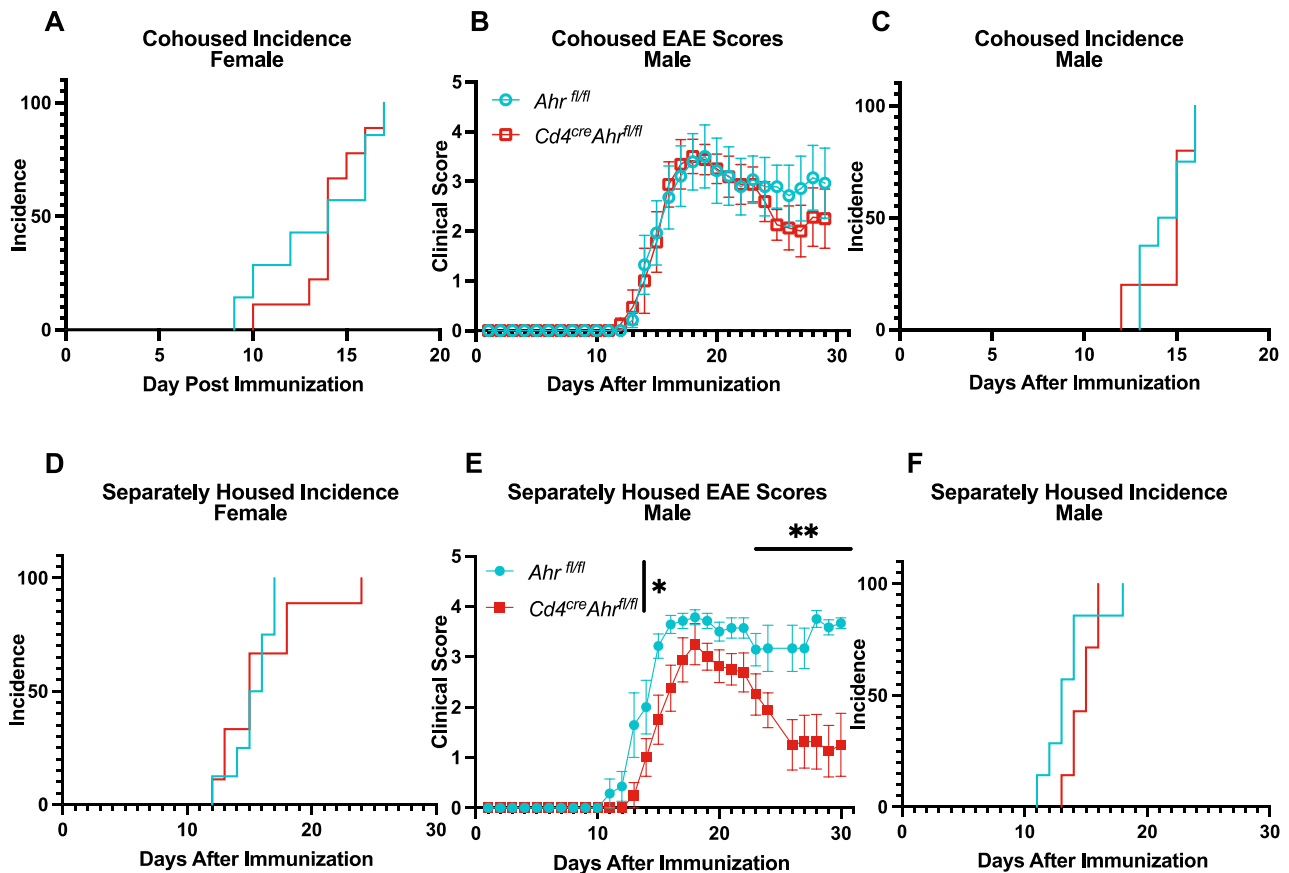

**S1 Fig. Separately housed *Cd4<sup>cre</sup>Ahr<sup>fl/fl</sup>* recover from EAE phase.** (A) No genotype differences in EAE incidence from the experiment shown in Fig 1A. (B) No differences in EAE score or (C) incidence in cohoused male mice (Males; n= 7-8; N=1; Mann-Whitney U Test [p=0.5680]) (D) No genotype differences in EAE incidence from the experiment shown in Fig 1D. (E) Separately housed male *Cd4<sup>cre</sup>Ahr<sup>fl/fl</sup>* mice recover from EAE while *Ahr<sup>fl/fl</sup>* mice maintain paralysis. (Males; n=7-8/group; N=1; Mann-Whitney U Test on total scores reported in legend [p=0.0010] and on single days reported on plot) (F) No difference in incidence of cohoused male mice.
