# Supplementary material for: The activity of the aryl hydrocarbon receptor in T cells tunes the gut microenvironment to sustain autoimmunity and neuroinflammation
Source: PubMed Central journal article supplement (PMC9928083; doi:10.1371/journal.pbio.3002000), 2023-02-14
Supplement: pbio.3002000.s002.pdf [file pbio.3002000.s002.pdf]

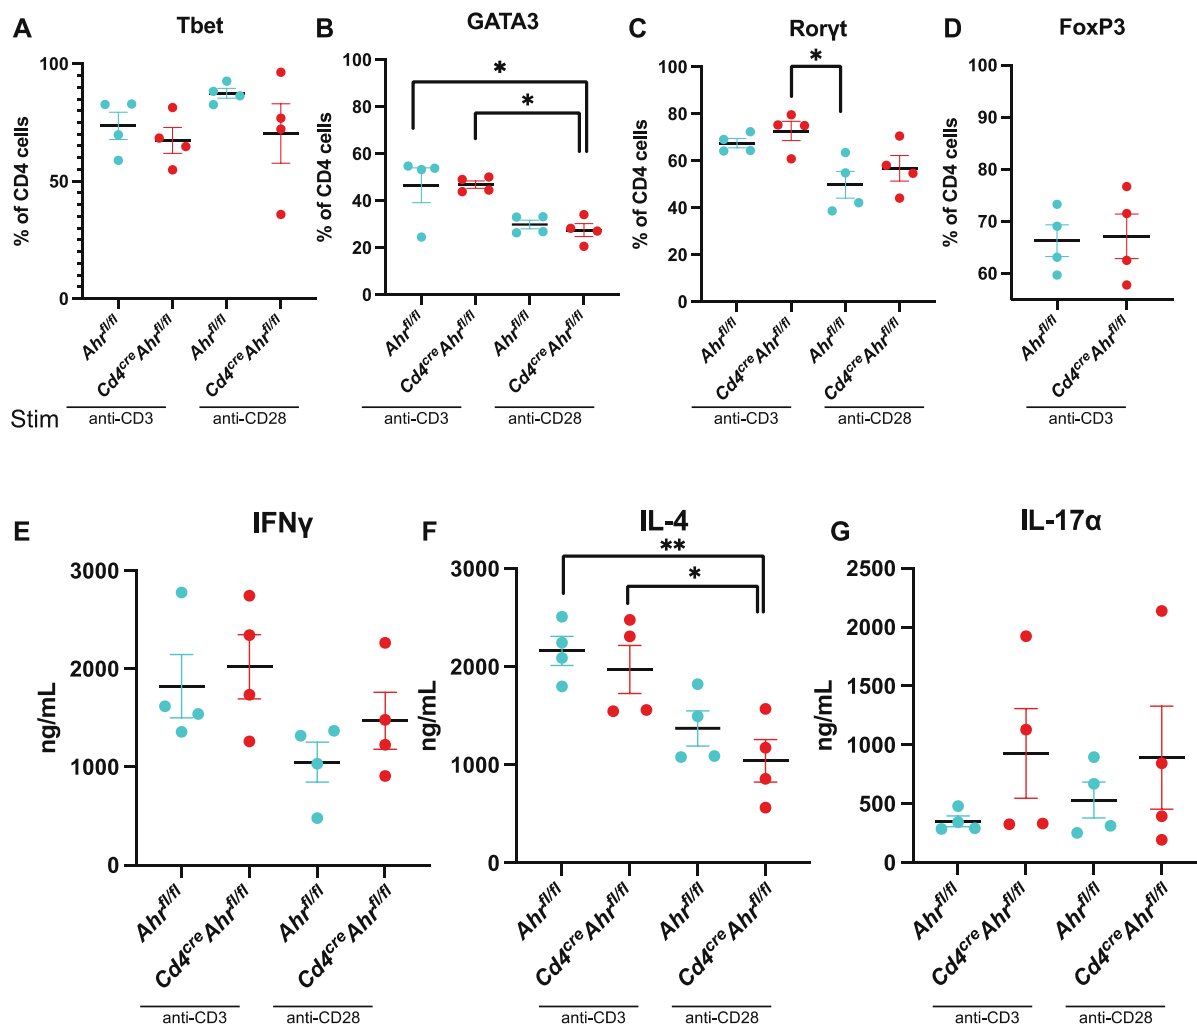

**S2 Fig. CD4<sup>+</sup> cells from separately housed *Cd4<sup>cre</sup> Ahr<sup>fl/fl</sup>* have no change in differentiation capacity or cytokine production.** (A) Flow cytometric quantification of Tbet<sup>+</sup> cells differentiated to T<sub>H</sub>1 cell type and stimulated for 24 hours with either anti-CD3 or anti-CD28 (n=4 mice/group; N=1 experiment; Ordinary one-way ANOVA [p=0.2927]). (B) Flow cytometric quantification of GATA3<sup>+</sup> cells differentiated to T<sub>H</sub>2 cell type and stimulated for 24 hours with either anti-CD3 or anti-CD28 (n=4 mice/group; N=1 experiments; Ordinary one-way ANOVA [p=0.0076] followed by Tukey's Post-Hoc). (C) Flow cytometric quantification of RORγt<sup>+</sup> cells differentiated to T<sub>H</sub>17 cell type and stimulated for 24 hours with either anti-CD3 or anti-CD28 (n=4 mice/group; N=1 experiment; Ordinary one-way ANOVA [p=0.0163] followed by Tukey's Post-Hoc). (D) Flow cytometric quantification of FoxP3<sup>+</sup> cells differentiated to T<sub>reg</sub> cell type and stimulated for 24 hours with either anti-CD3 or anti-CD28 (n=4 mice/group; N=1 experiment; Ordinary one-way ANOVA [p=0.8801]). (E) IFNγ ELISA on supernatant of differentiated T<sub>H</sub>1 cells stimulated for 24 hours with either anti-CD3 or anti-CD28 (n=4 mice/group; N=1 experiment; Ordinary one-way ANOVA [p=0.8639]). (F) IL-4 ELISA on supernatant of differentiated T<sub>H</sub>2 cells stimulated for 24 hours with either anti-CD3 or anti-CD28 (n=4 mice/group; N=1 experiment; Ordinary one-way ANOVA [p=0.0064] followed by Tukey's Post-Hoc). (G) IL-17a ELISA on supernatant of differentiated T<sub>H</sub>17 cells stimulated for 24 hours with either anti-CD3 or anti-CD28 (n=4 mice/group; N=1 experiment; Ordinary one-way ANOVA [p=0.4826]).
