# Supplementary material for: The activity of the aryl hydrocarbon receptor in T cells tunes the gut microenvironment to sustain autoimmunity and neuroinflammation
Source: PubMed Central journal article supplement (PMC9928083; doi:10.1371/journal.pbio.3002000), 2023-02-14
Supplement: pbio.3002000.s003.pdf [file pbio.3002000.s003.pdf]

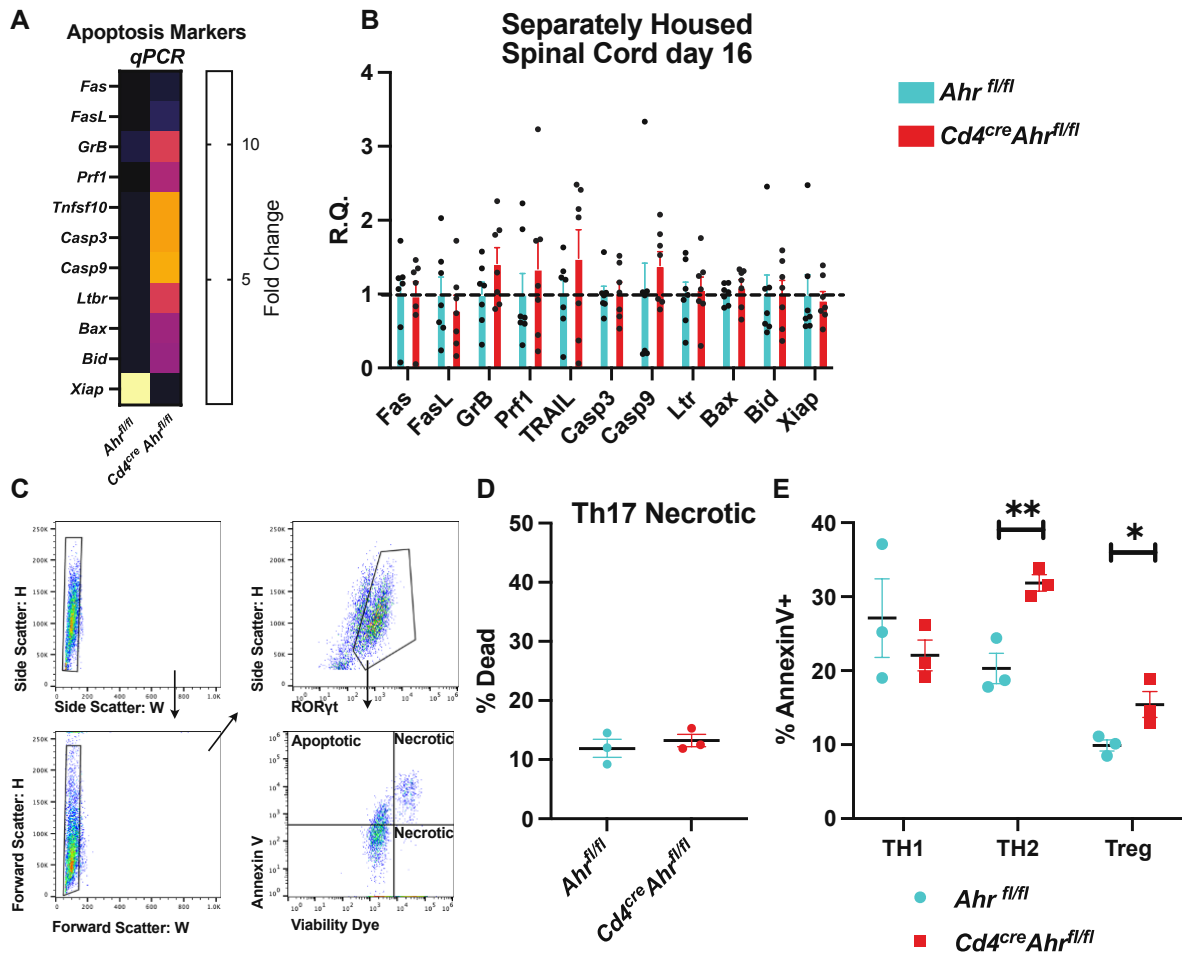

**S3 Fig. Apoptosis in T cells of separately housed *Cd4<sup>cre</sup>Ahr<sup>fl/fl</sup>* mice.** (A) Gene expression analysis (qPCR array) performed on spinal cord RNAs prepared from separately housed *Cd4<sup>cre</sup>Ahr<sup>fl/fl</sup>* mice and *Ahr<sup>fl/fl</sup>* littermate controls at the peak of disease (Day 16) shows increased pro-apoptotic transcripts and decreased anti-apoptotic transcript. (B) qPCR of spinal cord homogenate at peak of disease for the apoptosis related markers shown in (A) (Males and Females; n=6-7 mice/group; N=2 experiments). (C) Gating strategy for Annexin 5+ apoptotic and necrotic cells shown in show in Fig 4 and S3D-E Fig. (D) Quantification of total dead cells in separately housed TH17 skewed cells (n=3 mice/group; N=1 experiment; Unpaired T Test [p=0.5130]). (E) T cells skewed to TH1, TH2, or Treg *in vitro* from separately housed *Cd4<sup>cre</sup>Ahr<sup>fl/fl</sup>* mice have higher levels of the apoptotic marker Annexin 5 after 24 hours of CD3 stimulation. (n=3/group; N=1 experiment; Unpaired T tests [p=0.4276, 0.0078, 0.0442])
